# Supplementary material for: Electrochemical properties of PX-phase PbTiO3 electrode for sodium ion batteries
Source: Royal Society of Chemistry journal article supplement (doi:10.1039/c7ra03622a), 2017-01-01
Supplement: c7ra03622a1.pdf [file c7ra03622a1.pdf]

## Supplementary Information

### Electrochemical properties of PX-phase $\text{PbTiO}_3$ electrode for sodium ion batteries

Yixiang Zhang,<sup>a</sup> Muwei Ji,<sup>a,b,c</sup> Ziyi Liu,<sup>a</sup> Yiqing He,<sup>a</sup> Yao Hu,<sup>a</sup> Qinghua Yang,<sup>a</sup> Bo Li,<sup>a</sup> and Jin Wang<sup>\*a</sup>

- Advanced Materials Institute, Graduate School at Shenzhen, Tsinghua University, Shenzhen 518055, P.R. China. Email: Wang.jin@sz.tsinghua.edu.cn
- Institute of Chemistry, Chinese Academy of Science, Beijing, 100190, P.R. China.
- College of Chemistry and Environmental Engineering, Shenzhen University, Shenzhen, 518061, P.R. China.

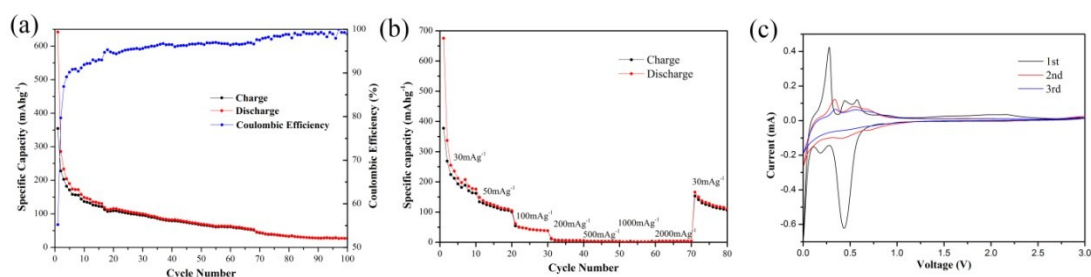

**Figure S1.** (a) Cycling capacities and coulombic efficiency of PT/PVDF electrode; (b) Rate capability of PT/PVDF electrode; (c) Cyclic voltammogram curves of PT/PVDF electrode.

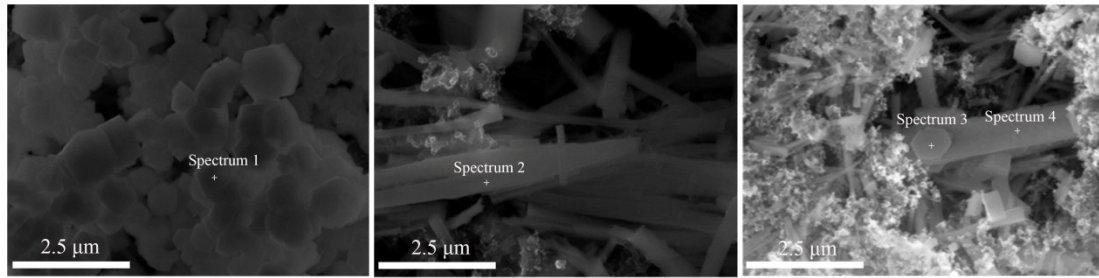

| Spectrum   | Pb    | Ti    | O     | Na    | F    | Total |
|------------|-------|-------|-------|-------|------|-------|
| Spectrum 1 | 15.36 | 0.7   | 71.03 | 12.91 |      | 100   |
| Spectrum 2 | 8.79  | 9.52  | 60.44 | 14.11 | 7.14 | 100   |
| Spectrum 3 | 22.94 | 13.36 | 45.88 | 11.14 | 6.68 | 100   |
| Spectrum 4 | 14.42 | 16.37 | 54.58 | 7.61  | 7.02 | 100   |

**Figure S2.** EDS analysis at different section of PT/PVDF electrodes first charged to 3V and the relative atomic ratio of the detected elements.
